# Supplementary material for: Doped penta-graphene and hydrogenation of its related structures: a structural and electronic DFT-D study
Source: Royal Society of Chemistry journal article supplement (doi:10.1039/c6cp02781d), 2016-01-01
Supplement: c6cp02781d1.pdf [file c6cp02781d1.pdf]

## SUPPORTING INFORMATION

### **Doping penta-graphene and hydrogenation of its related structures: a structural and electronic DFT-D study**

José de Jesús Quijano-Briones<sup>a</sup>, Héctor Noé Fernández-Escamilla<sup>a</sup>, Alfredo Tlahuice-Flores\*,

CICFIM-Facultad de Ciencias Físico-Matemáticas, Universidad Autónoma de Nuevo León, San Nicolás de los Garza, NL 66450, México

Email: tlahuicef@gmail.com

**Table S1.** Relaxed unit cells of all studied structures, and fractional coordinates of parent penta-C structure.

**Figure S1.** Bond lengths of all studied structures.

**Figure S2.** Structure of Penta-C doped with Sn.

**Figure S3.** Representation of the deflection angle of the irregular pentagonal rings constituting the 2D layer of studied structures.

**Figure S4.** Comparing deflection angles for doped and hydrogenated structures.

**Figure S5.** Phonon dispersion of penta-graphene based on GGA-PBE.

**Figure S6.** Comparison of Phonon dispersion plots of doped penta-C structures and its hydrogenated related structures.

**Figure S7.** Phonon dispersion plots of instable structures.

**Figure S8.** Snapshots of BOMD simulation of H-Sn-penta-C structure.

**Figure S9.** Bands structures of calculated compounds based on PBE functional.

**Figure S10.** Comparison of bands structure of penta-C based on PBE and HSE06 functionals.

**Table S1.** Relaxed unit cells of all studied structures.

| Compound     | a = b (Å) | c (Å)   |
|--------------|-----------|---------|
| penta-C      | 3.6386    | 15.0147 |
| H-penta-C    | 3.4897    | 17.5589 |
| penta-C-Si   | 4.4105    | 16.6516 |
| H-penta-C-Si | 4.2179    | 18.2827 |
| penta-C-Ge   | 4.5986    | 16.762  |
| H-penta-C-Ge | 4.4088    | 18.5143 |
| penta-C-Sn   | 4.8856    | 16.285  |
| H-penta-C-Sn | 4.689     | 18.783  |

In red colour is indicated instable structures.

Fractional coordinates of parent penta-C. In table S1 are given its cell parameters.

C 0.000 0.000 0.449  
 C 0.629 0.869 0.490  
 C 0.500 0.500 0.449  
 C 0.369 0.129 0.490  
 C 0.869 0.369 0.409  
 C 0.129 0.629 0.409

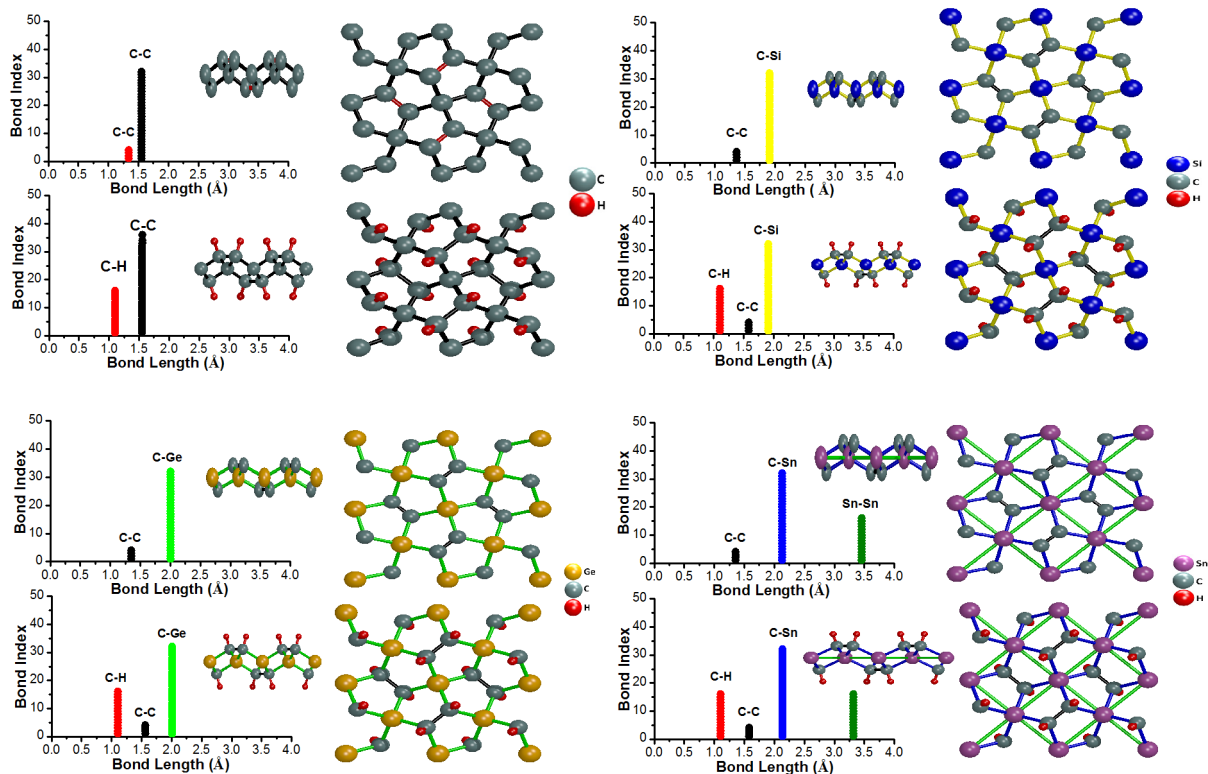

**Figure S1.** Bond lengths of all studied structures. After hydrogenation C-C bonds suffer of enlargement getting close to the value found in diamond ( $sp^3$  hybridization). Interestingly, in H-penta-C-Sn, Sn-Sn bonds are shorter than in penta-C-Sn structure.

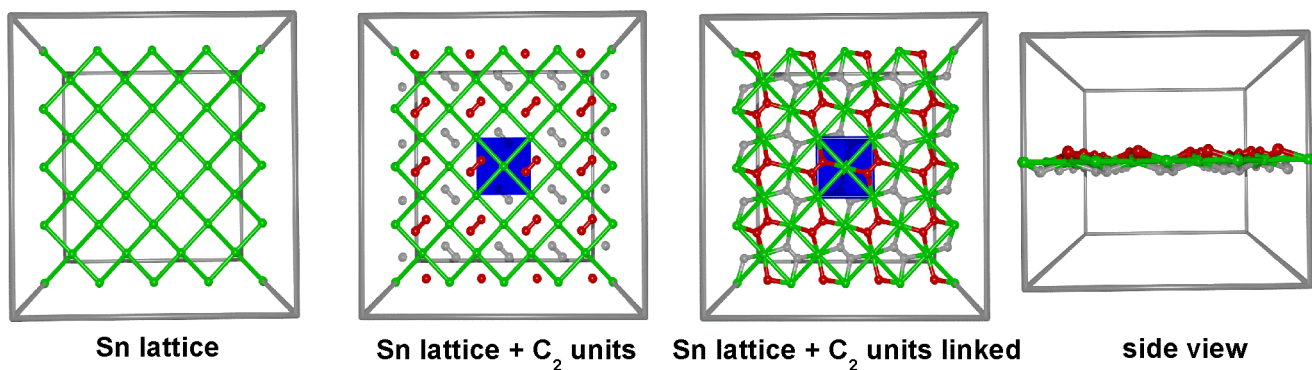

**Figure S2.** Structure of penta-C doped with Sn atoms. Sn, and C atoms are displayed in green and gray/red colors. Side view clearly shows that C atoms are distributed on both sides of the Sn lattice forming C<sub>2</sub> units. In blue color is shown the translational cell.

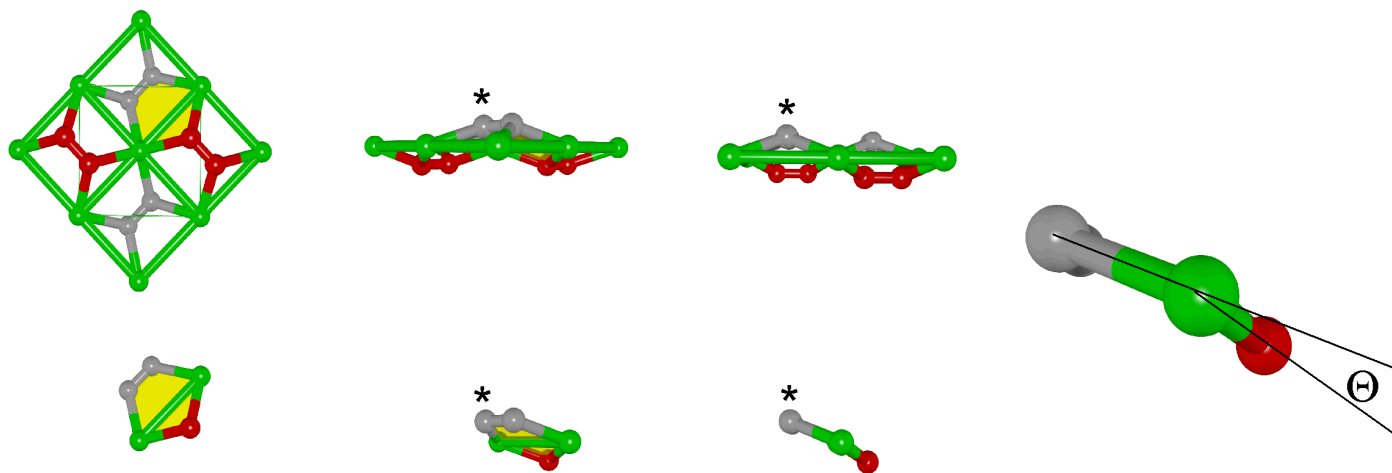

**Figure S3.** Procedure to choose an irregular pentagonal ring of penta-C-Sn structure. Asterisks are used as a visual help on two orientations of the same 2D layer. Middle frame on the right side shows the deflection angle ( $\theta$ ) of an irregular pentagonal ring. Noteworthy is that all the irregular pentagonal rings are equal and related by symmetry along the 2D framework.

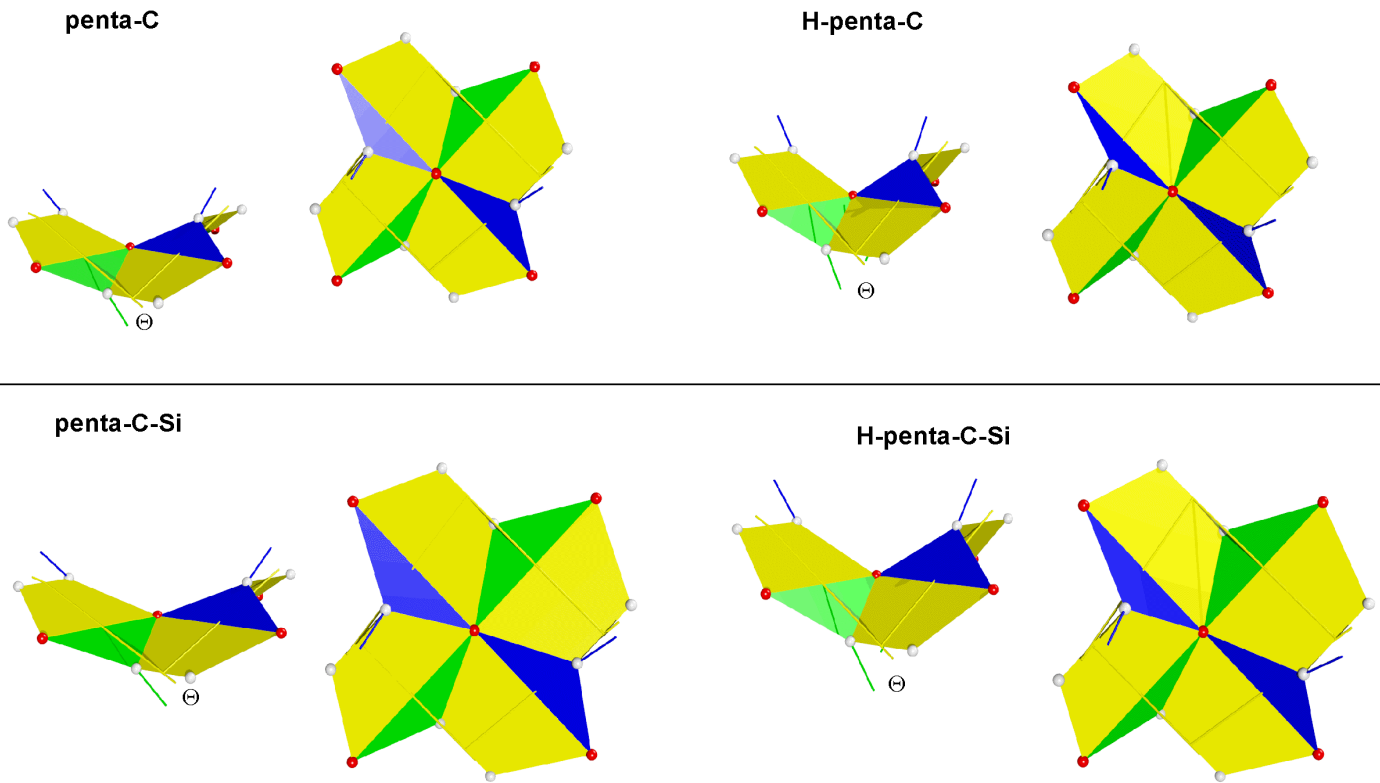

**Figure S4.** Major deflection angles found among all the studied structures. Left column corresponds with doped penta-C structures and right column presents hydrogenation of doped structure (penta-graphane). It is evident that after hydrogenation, the deflection angle increases.

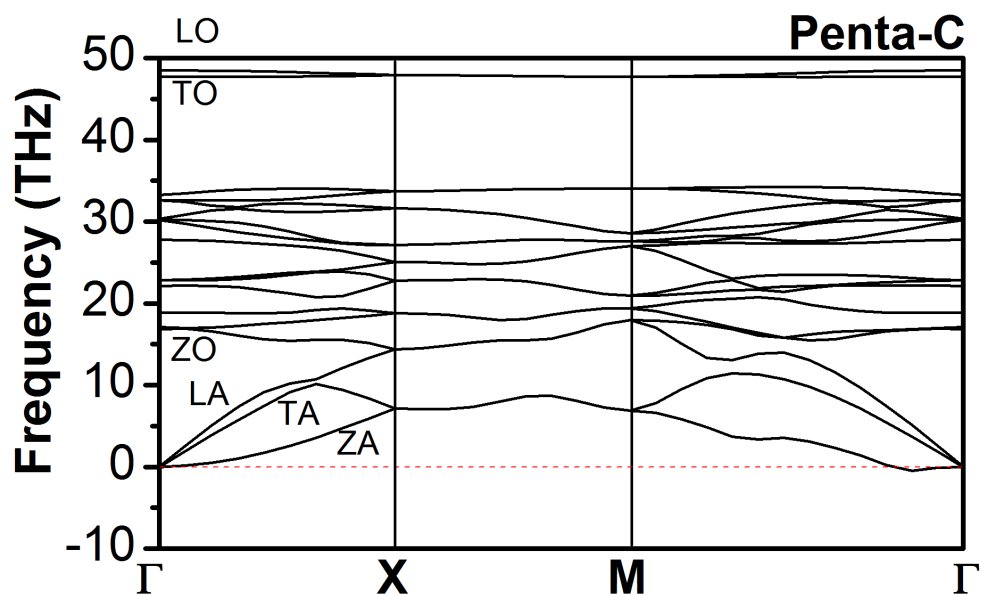

**Figure S5.** Phonon dispersion of penta-graphene based on GGA-PBE. ZA stands for out-of-plane acoustic branches; TA is transverse acoustic branch; LA is Longitudinal acoustic branch; ZO stands for out-of-plane optical phonons; TO is transverse optical phonons, and LO is the longitudinal optical branch.

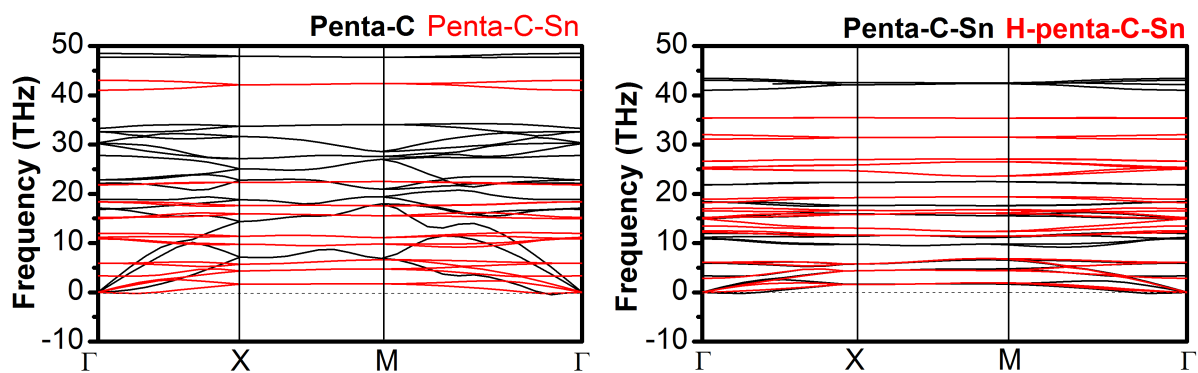

**Figure S6.** Comparison of Phonon dispersion plots of penta-C against Sn doped penta-C (left panel) and among Sn-doped penta-C and its hydrogenated structure (right panel).

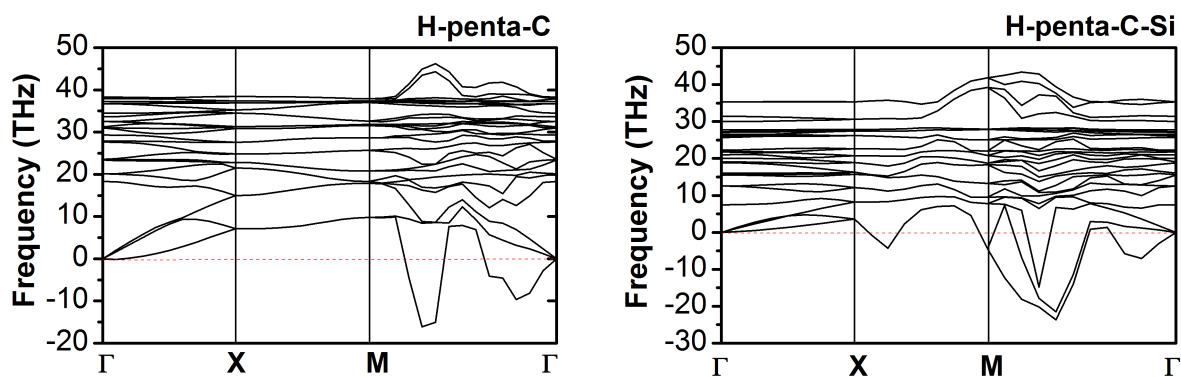

**Figure S7.** Phonon dispersion plots of instable structures. It is found intense imaginary frequencies along  $\Gamma$ -M direction of hydrogenated structures of penta-C and penta-C-Si.

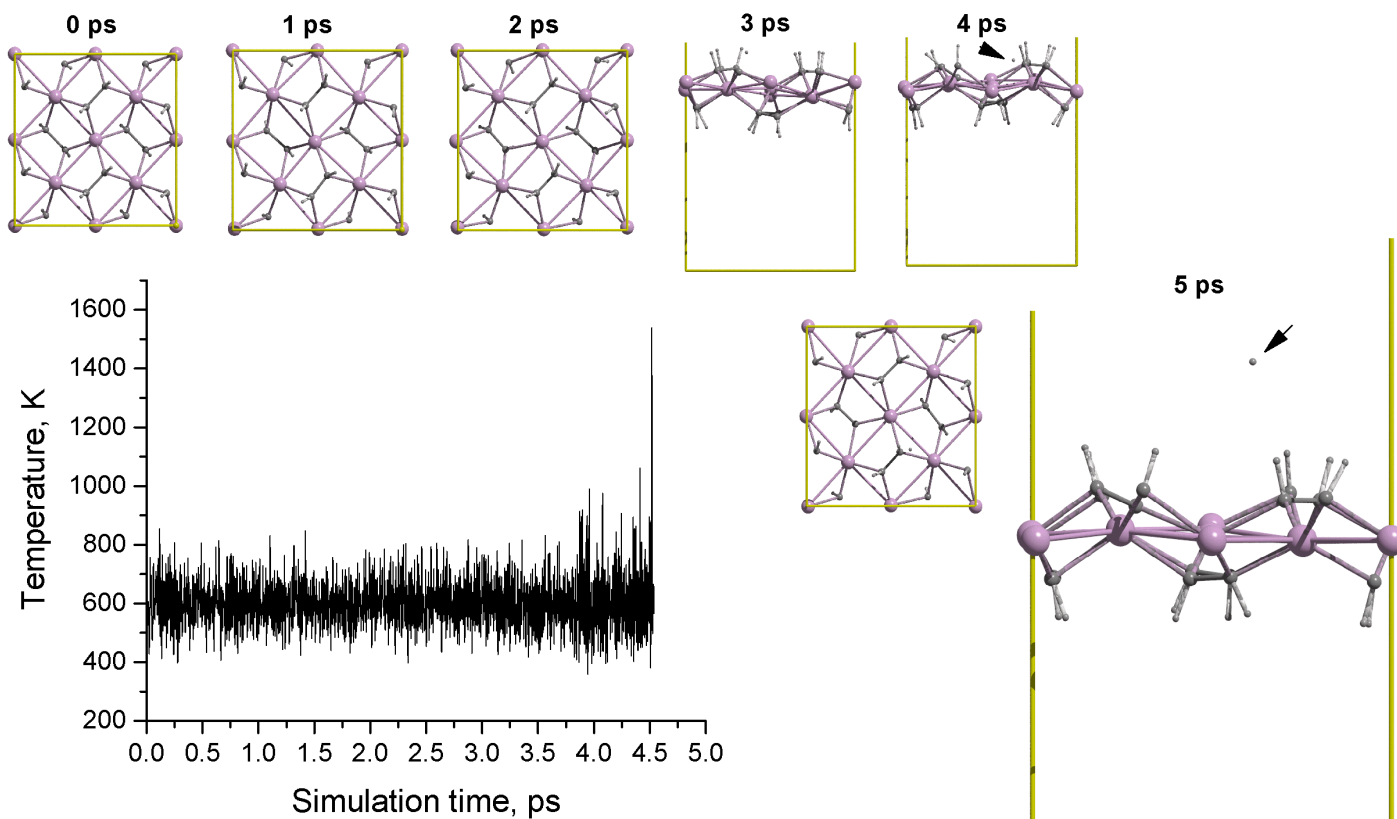

**Figure S8.** BOMD snapshots for H-Sn-penta-C simulation which was carried out at 600 K and 1 atm. Leaving H atom is indicated with an arrow.

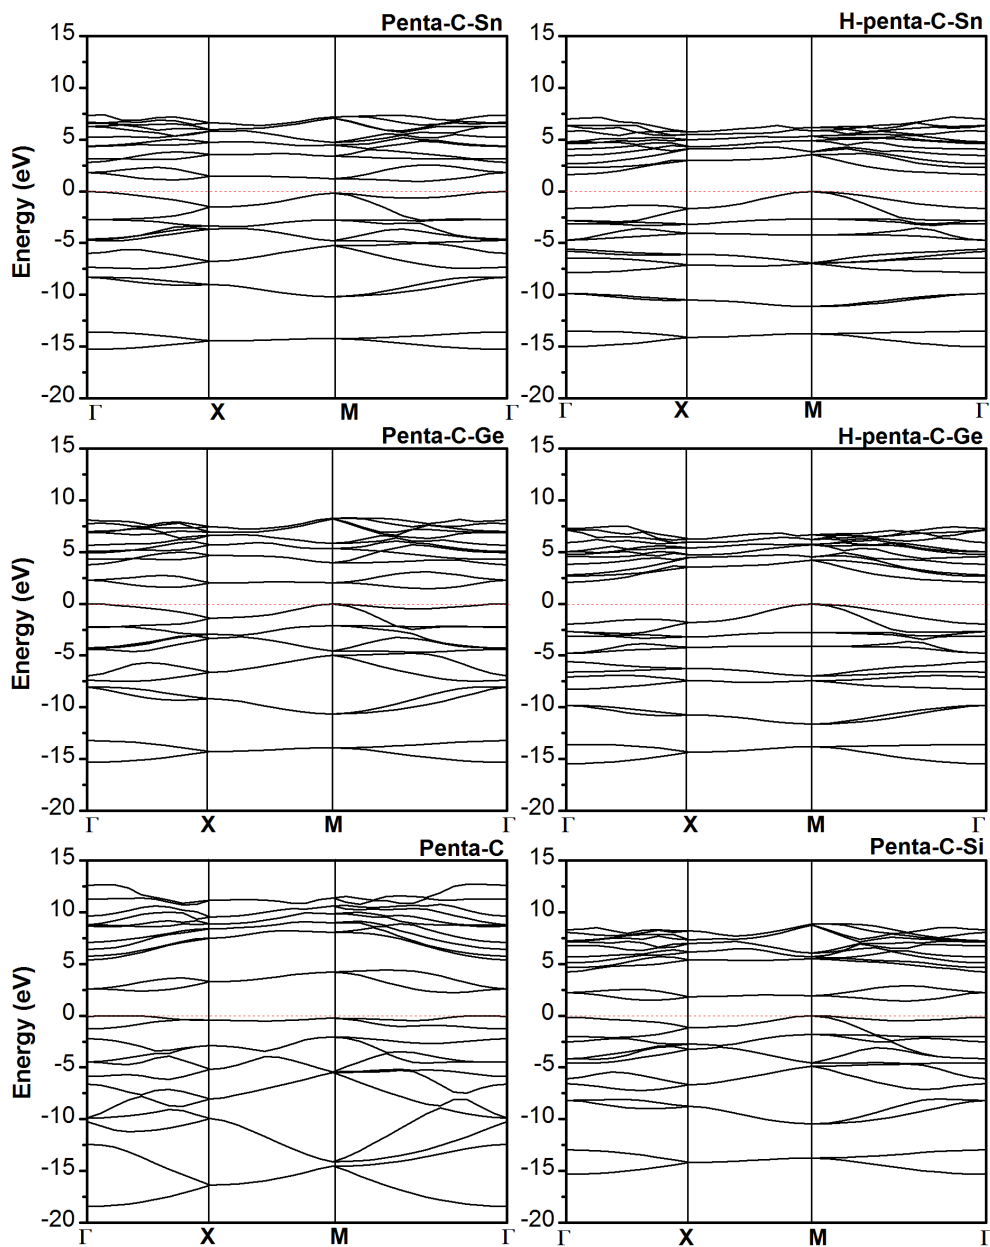

**Figure S9.** Bands structures of calculated compounds based on PBE functional. Fermi energy is located at zero.

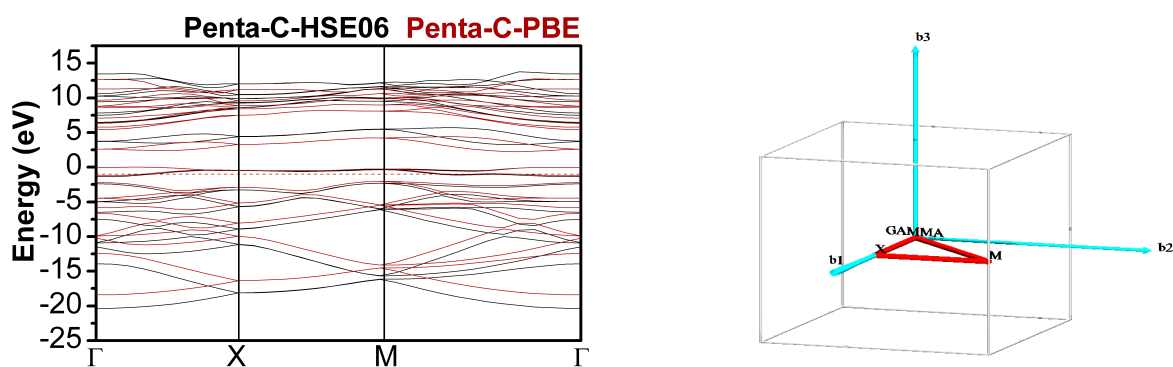

**Figure S10.** Comparison of bands structure of penta-C based on PBE and HSE06 functionals. Right panel shows special k points and the directions along them.
